# Supplementary material
Source: PubMed Central journal article supplement (PMC7606451)
Supplement: NIHMS1615002-supplement-supp_info.pdf [file NIHMS1615002-supplement-supp_info.pdf]

# "Use of TOLAC Prediction Calculators Among Midwives and Collaborators"

Calculators predicting TOLAC success have become widely popular as a counseling aid when women have a history of cesarean. There is little documentation in the literature regarding how these calculators are ACTUALLY USED by providers. The information gathered here will help document how midwives and their physician colleagues use predictive calculators in caring for women facing trial of labor versus elective repeat cesarean.

Does your practice offer trial of labor after cesarean (TOLAC)?

- Yes  
 No

The reason(s) your practice does "[not]" offer TOLAC are:

- We offer out of hospital birth only  
 No in house anesthesia  
 No in house obstetrician  
 Lack of midwifery support for TOLAC  
 Lack of physician support for TOLAC  
 Only physicians attend TOLAC at my facility  
 Other

"[Other]" reason(s) your practice does not offer TOLAC

\_\_\_\_\_

Is your practice is able to accommodate women who desire a TOLAC?

- Nearly all the time  
 Some of the time  
 Rarely

## Among the following groups at your birthing site, the GENERAL ATTITUDE toward TOLAC is:

|                                          | Very<br>unsupportive  | Unsupportive          | Supportive            | Very supportive       | Don't know or<br>n/a  |
|------------------------------------------|-----------------------|-----------------------|-----------------------|-----------------------|-----------------------|
| Midwives                                 | <input type="radio"/> |
| Collaborating Physician(s)               | <input type="radio"/> |
| Department or hospital<br>administration | <input type="radio"/> |
| Nursing                                  | <input type="radio"/> |

Do YOU (or your CNM/CM PRACTICE) require using a TOLAC success prediction calculator for women seeking TOLAC?

- Yes  
 No  
 Sometimes  
 Depends of provider

Does your collaborating PHYSICIAN require using a TOLAC prediction calculator for women seeking TOLAC?

- Yes  
 No  
 Sometimes  
 Depends of provider  
 Don't know

Does your FACILITY (department or administration) require using a TOLAC success prediction calculator for women seeking TOLAC??

- Yes  
 No  
 Sometimes  
 Depends of provider  
 Don't know

Which calculator is used?

- Society for Maternal Fetal Medicine
- Flamm
- Other
- Any or up to provider
- I have no idea

Does your practice, facility, or collaborating physician(s) require documenting a predicted success percentage in the chart?

- Yes
- No
- Depends on provider
- Not required but encouraged
- I don't know

Does your practice, facility or collaborator(s) use a predicted success "cut off" to encourage or discourage TOLAC? (check all that apply)

- Cut-offs are not used to limit TOLAC
- Women with low scores are discouraged from attempting TOLAC
- Women with high scores are encouraged to attempt TOLAC

If yes, what cut off percent is used? (whole numbers only )

\_\_\_\_\_

Are there hard cut offs below which TOLAC is NOT ALLOWED?

- Yes
- No

If yes, what percent cut off is used? (whole numbers only)

\_\_\_\_\_

How else are TOLAC success prediction calculators used in your practice? Please describe

\_\_\_\_\_

How would you describe inter-professional attitudes about TOLAC success predictors use in your setting?

- Most midwives and physicians are on the same page
- There are some differences in how midwives and physicians view and use TOLAC success predictors
- There are strong disagreements about how and whether TOLAC success predictors should be used

Please briefly describe agreement or disagreement regarding TOLAC success predictor use in your setting

\_\_\_\_\_

Additional comments about TOLAC/VBAC in your practice or facility

\_\_\_\_\_

Additional comments about TOLAC calculator use in your practice or facility

\_\_\_\_\_
